# Supplementary material for: A Fluorescent “Turn-On” Clutch Probe for Plasma Cell-Free DNA Identification from Lung Cancer Patients
Source: MDPI journal article supplement (doi:10.3390/nano12081262), 2022-04-08
Supplement: s1 [file s1]

# A Fluorescent “Turn-On” Clutch Probe for Plasma Cell-Free DNA Identification from Lung Cancer Patients

Lin Zhu <sup>1,†</sup>, Dongxu Zhao <sup>1,†</sup>, Lixin Xu <sup>1</sup>, Meng Sun <sup>1</sup>, Yueyue Song <sup>1</sup>, Mingrui Liu <sup>2</sup>, Menglin Li <sup>2,\*</sup> and Jinfeng Zhang <sup>1,\*</sup>

<sup>1</sup> Key Laboratory of Molecular Medicine and Biotherapy, School of Life Sciences, Beijing Institute of Technology, Beijing 100081, China; zhulin107@126.com (L.Z.); zhaodx@bit.edu.cn (D.Z.); xulixin1993@126.com (L.X.); m17863525419@163.com (M.S.); 3120201412@bit.edu.cn (Y.S.)

<sup>2</sup> School of Materials Science and Engineering, Beijing Institute of Technology, Beijing 100081, China; 3220205144@bit.edu.cn (M.L.)

\* Correspondence: menglinli90@bit.edu.cn (M.L.); jfzhang@bit.edu.cn (J.Z.)

† These authors contributed equally to this work.

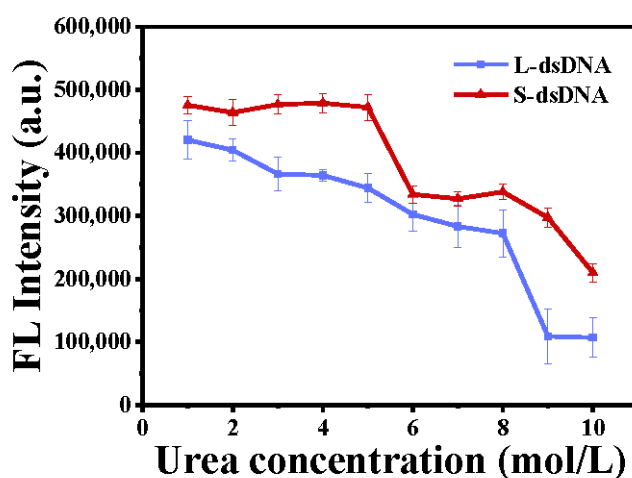

**Figure S1.** The fluorescence spectra of different concentrations of urea with L-dsDNA and S-dsDNA.
